# Supplementary material for: Estimation of the National Disease Burden of Influenza-Associated Severe Acute Respiratory Illness in Kenya and Guatemala: A Novel Methodology
Source: PLoS One. 2013 Feb 27;8(2):e56882. doi: 10.1371/journal.pone.0056882 (PMC3584100; doi:10.1371/journal.pone.0056882)
Supplement: Appendix S2 — Equation used to calculate HIV prevalence in children. PMTCT is Prevention of Mother to Child Transmission. (DOCX) [file pone.0056882.s007.docx]

**Appendix S2**. Equation used to calculate HIV prevalence in children. PMTCT is Prevention of Mother to Child Transmission.

**HIV PrevChild = (PrevPMTCT * TRPMTCT) + (Prev Non-PMTCT * TRNonPMTCT) + ((Prev HIV+ -(PrevPMTCT * TRPMTCT) - (Prev Non-PMTCT * TRNonPMTCT))* TRbf)**

Where:

HIV PrevChild = HIV prevalence in children < 5

PrevPMTCT = Prevalence of HIV+ pregnant women participating in PMTCT (Based on prevalence of HIV+ women receiving ante-natal care, DHS, 2009)

TRPMTCT = Transmission rate from mothers receiving PMTCT (Hellen Muttai, personal communication, July 22, 2011)

Prev Non-PMTCT = Prevalence of HIV+ pregnant women not participating in PMTCT; (1- PrevPMTCT)

TR Non-PMTCT = Transmission rate from mothers not participating in PMTCT (*46*)

Prev HIV+ = Prevalence of HIV+ pregnant women (*47*)

TRbf = Transmission rate from breastfeeding (*48*)
